1 *Unlocking the mentally ill in Indonesia:*

2 *An empirical study of the effectiveness of a “Bebas Pasung”*

3 *program in Central Java*

4  
5  
6 Tri H. Tyas<sup>1\*</sup>, Mary-Jo D. Good<sup>2¶</sup>, Bambang Pratikno<sup>3&</sup>, M.A. Subandi<sup>1¶</sup>, Carla R. Marchira<sup>4&</sup>,  
7 Byron J. Good<sup>2¶</sup>

8  
9 <sup>1</sup> Faculty of Psychology, Gadjah Mada University, Yogyakarta, Indonesia

10 <sup>2</sup> Department of Global Health and Social Medicine, Harvard Medical School, Boston, Massachusetts, United States  
11 of America

12 <sup>3</sup> Soerojo Mental Hospital, Magelang, Indonesia

13 <sup>4</sup> Department of Psychiatry, Faculty of Medicine, Public Health, and Nursing, Gadjah Mada University, Yogyakarta,  
14 Indonesia

15  
16 \* Corresponding authors:

17 Email: [t.h.tyas@ugm.ac.id](mailto:t.h.tyas@ugm.ac.id) (THT)

18  
19  
20 **Abstract**

21  
22 **Background**

23 Locking or confinement of persons with severe mental illness has been common in Indonesia.  
24 In 2010, the Ministry of Health declared a policy that persons who were locked (*pasung*) should  
25 be unlocked or freed (*bebas*) from confinement and provided mental health services. This  
26 study is an empirical evaluation of the effectiveness of one *Bebas Pasung* program in  
27 Indonesia at two-year follow-up.

28  
29 **Methods**

30 From medical records in Soerojo Mental Hospital, Magelang, Central Java, 114 persons with  
31 severe mental illness who had been unlocked, treated, and returned to the community from  
32 four districts served by the hospital were identified. At two-year follow-up, 62 caregivers were  
33 able to be contacted and willing to participate in a study. Data were collected from hospital  
34 records about condition of the patient at time of 'unlocking' and at discharge, and primary  
35 caregivers were interviewed about the previous locking and care of the patient since return, as  
36 well as experiences of caregiving.

## 38 Results

39 We provide descriptive data concerning history of illness, reasons for locking, type of  
40 confinement, and care of the individual since return. 58% of those unlocked were men, 80%  
41 had diagnoses of schizophrenia, and mean age was 35. At follow-up, 24% of this sample had  
42 been re-locked; only 44% took medications regularly, including 33% of those re-locked and  
43 47% of those not relocked. A majority cared for themselves, half were partially or fully  
44 productive, and the quality of life of family caregivers improved significantly since their family  
45 member was unlocked, treated, and returned home.

46

## 47 Conclusions

48 This program successfully unlocked, treated, and returned to their homes persons with severe  
49 mental illness living in *pasung* or restraints. Findings suggest such unlocking programs need to  
50 be linked more closely to community-based mental health and rehabilitation services, maintain  
51 care of the patient, and provide a path toward recovery.

52

53 Keywords: unlocking; mentally ill; the 'bebas pasung' program; Central Java, Indonesia

54

## 55 Introduction

56 The complex issues of institutional confinement of persons living with severe mental  
57 illness, as well as the use of seclusion and restraint within institutions, lie at the heart of the  
58 history of mental health services and efforts at reform. Although widely acknowledged and  
59 often vividly described, far less is known about the locking or confinement of persons with  
60 psychotic illness in community settings and families' homes. Over the last two decades, the  
61 rise of a renewed global mental health movement [1], of increased human rights attention to  
62 confinement of persons with severe mental illness in community settings [2] and of robust  
63 efforts within the WHO to develop specific guidelines for community based mental health care  
64 in low resources settings, launched initially as the Mental Health Gap Action Programme  
65 (mhGAP), have led to what might be called an 'unlocking revolution' in some parts of the world.  
66 China and Indonesia serve as prominent examples [1–5].

67 In Indonesia, the term *pasung* is used to describe a wide range of forms of restraint,  
68 confinement and seclusion in community and home settings. These include use of wooden  
69 shackles, chains or tying with ropes, as well as seclusion in locked rooms in homes or separate

70 spaces. Although use of *pasung* has been formally banned since 1977 in Indonesia, it is widely  
71 known to be highly prevalent, particularly among families with limited access to formal mental  
72 health services

73         Genuine focus on directing Indonesian mental health services to 'unlocking' is recent.  
74 Several turning points led both indirectly and directly to efforts to dramatically re-imagine  
75 mental health care in Indonesia, with renewed focus on trauma and explicit efforts to place  
76 unlocking and care for the severely mentally ill at the center of national mental health policy.  
77 The violence associated with the fall of the Suharto regime in 1998, the ensuing ethnic and  
78 religious violence and the bombings in Bali [6,7] and Jakarta [8] fostered a new interest in  
79 "trauma" and led to national and international efforts to extend mental health services beyond  
80 psychotic illness alone. The Great Indian Ocean Tsunami that struck the province of Aceh on  
81 December 26, 2004, killing over 160,000 persons, led to massive national and international  
82 responses, including psychosocial interventions. The tsunami brought to sharp attention a  
83 violent, often brutal conflict between the Indonesian military and the Free Aceh Movement  
84 underway in Aceh at the time of the tsunami. The Helsinki Agreement [9] ended that conflict,  
85 and mental health activities were extended to those affected by the conflict as well. While  
86 'trauma' was one focus of the response to this dual disaster in Aceh, projects led by the  
87 Ministry of Health, as well as those supported by the International Organization for Migration,  
88 used the opportunity to develop far more comprehensive models of mental health services  
89 than had been present to date in any part of Indonesia, leading to the evolution of what  
90 became described as the 'Aceh model' of community-based services [10-12]. Unlocking of  
91 persons with severe mental illness and bringing them into care was one explicit policy of the  
92 provincial government of Aceh [13].

93         In 2010, the Division of Mental Health of the Ministry of Health of Indonesia, led by Dr.  
94 Irmansyah, launched the 2010 *Bebas Pasung* ('Free from *Pasung*') initiative, aimed at drawing

95 attention to the plight of thousands of persons with severe mental illness in Indonesia living in  
96 *pasung*, bringing into view what was considered a major human rights issue and focusing new  
97 attention on freeing persons living in restraints in the community and bringing them into care  
98 [5,14,15]. This was a critical turning point in imagining the future of mental health services for  
99 Indonesia, making unlocking of persons in *pasung* an explicit focus of mental health policy and  
100 research. It was further supported by the passage of Indonesia's first real national mental  
101 health law in 2014, passage of a National Disability Law in 2016, Indonesia's ratification of the  
102 internationally recognized Convention on the Rights of Persons with Disabilities, and the  
103 broadening of the "Standard Minimal Services" to be provided by all districts through their  
104 primary care system to include care of persons with severe mental illness.

105         Given the decentralized nature of health policy and services implementation in  
106 Indonesia, the 2010 *Bebas Pasung* initiative was implemented with varying levels of intensity  
107 and in quite different ways across the very diverse provinces and districts of the country. A  
108 recent systematic review of the research on *pasung* in both English and Indonesian makes it  
109 clear both that persons living in *pasung* remain widespread in Indonesia and that systematic  
110 data about its prevalence are quite limited [5]. In 2014, the Ministry of Health of Indonesia  
111 estimated lifetime prevalence of persons experiencing *pasung* as 57,000 persons and point  
112 prevalence as 18,800. Hidayat et al. [5] suggest that given how families conceal persons living  
113 in *pasung*, this was likely a serious underestimation. They also argue that the government's  
114 claim that the Free Pasung Program reduced point prevalence to 12,200 by 2018 is open to  
115 serious doubt. The Human Rights Watch [2] report on shackling in Indonesia makes it clear  
116 that confinement in *pasung* remains a persistent problem in Indonesia, as well as just how little  
117 we know about the nature and prevalence of the phenomenon.

118         The Free Pasung Program unleashed not only a series of local initiatives, associated  
119 with provincial and district governments and national and regional mental hospitals, but also

120 led to a significant body of new research. Hidayat et al. [5] identify 34 published research  
121 articles on *pasung* in Indonesia in English and Indonesian through 2019. Of these, 21 are  
122 qualitative reports, and studies are judged to be of variable quality. The Ministry of Health  
123 claimed that 10% of persons in *pasung* were hospitalized and treated between 2009 and 2014.  
124 However, the review finds that "there is no data on how many of those PWMD [Persons With  
125 Mental Disorders] were successfully supported through rehabilitation or returned to *pasung* in  
126 the community." [5]. The overall finding of the review (p. 16) states this even more forcefully.  
127 "In Indonesia, the Bebas Pasung Program ... involves the provision of community-based  
128 mental health services alongside intensive education campaigns. None of the articles  
129 measured the effectiveness of the program or how the program is delivered."

130 This article provides just such data about one program developed as part of the larger  
131 Bebas Pasung Initiative. It briefly describes the implementation of the *bebas pasung* policy in  
132 Central Java's primary psychiatric hospital, *Rumah Sakit Jiwa Soerojo* (Soerojo Mental  
133 Hospital), and provides findings from a two-year follow-up study of persons unlocked, treated  
134 in the hospital, and returned to their families. The study asks how effective the unlocking  
135 program was, what its strengths and weaknesses were, and how family caregivers experienced  
136 the program and evaluated its efficacy.

137

## 138 **Methods**

139

140 The study reported here was a two-year follow-up study, using mixed methods, of one  
141 specific *Bebas Pasung*, or unlocking, program, carried out by the Soerojo Mental Hospital, in  
142 Magelang, Central Java, beginning in 2012. The study gathered data concerning 62 individuals  
143 who had been locked, treated in Soerojo Hospital, and released back into families and  
144 communities. The study was designed to provide important descriptive data about the history

145 of illness of those locked, how the individual had come to be locked, the form of *pasung*, and  
146 the patient's condition at time of hospitalization and after return to the family. It also focused  
147 explicitly on who constituted the caregivers, what their experience of caregiving had been prior  
148 to unlocking, and how gender of patient and caregiver influenced that experience. The study  
149 was designed to evaluate the effectiveness of the intervention program, including how many  
150 persons had been relocked since returning home, factors related to such relocking, and the  
151 caregivers' overall experience of the program.

152 The study was approved by the ethics review boards of Harvard Medical School and  
153 Soerojo Mental Hospital's research ethics committee.

154

## 155 **The Central Java Intervention Project: Procedures of the** 156 **Unlocking and Treatment Program**

157 In 2012, the Governor of the Province of Central Java announced a policy of *bebas*  
158 *pasung*, requiring that intersectoral programs at provincial and district levels should be  
159 developed to implement the policy. He declared that relevant ministries, health service  
160 providers, and hospitals should be responsible for implementing this policy and that the  
161 Provincial Health Office should be responsible for reporting the services they are providing to  
162 the office of the Governor. The policy mandated four types of activities: case-finding; provision  
163 of basic and referral health care; provision of rehabilitation services, using community-based as  
164 well as government services; and facilitation of the return of individuals who had been locked  
165 to their families and communities. Specific regulations for implementing these services were  
166 not developed. Importantly, the policy did not stipulate long-term or continuing services to be  
167 provided to individuals and families.

168           The Director of the central provincial mental hospital, *Rumah Sakit Jiwa Soerojo*  
169 (Soerojo Mental Hospital) in Magelang, made the decision that his hospital should take the lead  
170 in developing a program to implement the Governor's mandate and that services should be  
171 provided to unlocked individuals free of charge. Earlier in 2011, the hospital director made the  
172 hospital's Department of Public Mental Health (*Bagian Kesehatan Jiwa Masyarakat*, shortened  
173 routinely to *Bagian Keswamas*) responsible for developing and carrying out the policy, in  
174 collaboration with the clinical departments. This department, directed by a highly committed  
175 nurse, developed procedures and implemented the policy in several steps. First, the  
176 Department began a series of outreach activities into local communities. Outreach teams were  
177 developed to go into communities, meet with district and village officials and leaders to provide  
178 information about the program, provide community education through direct educational  
179 programs and by working with local women's organizations, and produce radio messages to  
180 educate the community about the nature of severe mental illness, the importance of unlocking,  
181 and the promise of free health services for those who were unlocked and brought to Soerojo  
182 Hospital for care. Although radio messages were broadcast throughout the region and  
183 services were to be provided free of charge to persons from throughout Central Java, a  
184 province with 35 districts with a population of over 32 million people, direct outreach services  
185 focused primarily on those districts closest to the city of Magelang.

186           Second, "evacuation teams," consisting of nurses, doctors, other hospital staff, and  
187 ambulance drivers from Soerojo Hospital, were developed to participate in releasing individuals  
188 who were locked and helping transport them to the hospital. Referrals requesting services were  
189 made to the hospital staff by family members, community leaders, primary health care center  
190 staff, staff from the Social Welfare ministry, and lay persons through a "hot line" provided by  
191 the hospital. Members of the staff of the hospital would verify the referral and arrange for an  
192 "evacuation" of the individual. Medical staff participated, along with local community

193 members, because many of those brought to the hospital were in poor physical and mental  
194 health condition.

195 Third, individuals were admitted into the hospital and provided with services in the  
196 medical, psychiatric, and rehabilitation units. The patients' conditions and services were  
197 recorded as part of the routine medical records of the hospital. Patients were often  
198 hospitalized in Soerojo Hospital -- or other state mental hospitals -- for one to three months to  
199 stabilize their medical condition and drug levels. Medical and "psychosocial" rehabilitation  
200 services were provided, including gardening in the hospital grounds, handicraft activities, and,  
201 for a limited number of patients, metal work and bicycle or motorcycle repair.

202 Finally, return to the community and to families was organized by hospital staff. Family  
203 members were contacted, invited to come to the hospital, meet with the hospital staff briefly,  
204 be given medications (usually for one month) and instructed on usage, and take the patient  
205 home. If families were unable to pick up patients, in a limited number of cases patients were  
206 returned using hospital ambulances or other resources. Families and patients were invited to  
207 return to the hospital's outpatient services for routine care and medications, or alternatively, to  
208 go to their local primary health care centers for medications. The program was scaled up  
209 rapidly, and in March of 2013 Soerojo Hospital reported that 1,135 individuals had been  
210 released from *pasung*, treated in Soerojo or one of the three other provincial mental hospitals,  
211 and returned to their communities.

## 212 **The Follow-Up Study Design**

213  
214 The study gathered data concerning the status of the patient and caregivers'  
215 experiences at time of unlocking (T1), the time of return of the patient to the family or  
216 community post-treatment (T2), and the time of the follow-up study which is beginning from  
217 June 8<sup>th</sup> 2013 to September 24<sup>th</sup> 2013 (T3). Information from hospital medical records and



218 description of the condition of the patient and family at the time of unlocking and at time of  
219 release from the hospital by members of the evacuation team and persons participating in the  
220 discharge were recorded by the research team. Stories and specific information were also  
221 gathered through a long interview with the individual's primary caregiver, asking retrospectively  
222 about the history of illness and locking, characteristics of the patient at both the time of  
223 unlocking and the time of return to the family, utilization of health services and medication,  
224 family experience throughout this process, and the status of the patient and medical care  
225 utilization since discharge from the hospital and specifically at the time of the follow-up  
226 interview.

## 227 **Sample**

228 The sample was developed by preparing a complete listing of individuals who  
229 participated in the unlocking program (N=114) from four districts -- the city and the district of  
230 Magelang, in which the hospital is located, and two adjacent districts, requiring travel of up to  
231 approximately three hours -- along with the contact information of the 'guardian' responsible  
232 for the hospitalization of the individual. An effort was made to contact all 114 guardians, to  
233 describe the study, and ask permission to visit the family. If guardians were family members,  
234 permission was requested directly to visit the family. If guardians were medical or social  
235 welfare staff or community leaders, they were asked to contact the family and ask for  
236 permission to contact them directly or visit. In some cases, the guardians could not be  
237 contacted. In some cases, the families declined to make a time to visit to participate in the  
238 study or the patient was no longer living with the family. When families were visited, a primary  
239 caregiver was identified to participate in the study. Inclusion criteria included that the caregiver  
240 be at least 19 years old, be cognitively and physically able to participate in the study, and be a  
241 primary caregiver at least since the time of the unlocking. The purpose of the study was

242 described, the caregiver was asked to give signed consent, and the individual with mental  
243 illness, when available, was asked to give oral consent. In the end, 68 families were visited,  
244 and complete data were collected for 62 individuals who were unlocked and their families.  
245 Visits, including explaining the study, being given informed consent, participating in completing  
246 the family questionnaire and the formal interview, and socializing lasted from two to four hours.  
247 First author and or one of the nurse asked the participants to fill out the family questionnaire or  
248 read the questionnaire out loud and asked participants to respond. Interviews were conducted  
249 by the first author, by one of four nurses trained to carry out the interviews, or some grouping  
250 of more than one of these. In addition, the first author and/or one of the nurse interviewers  
251 returned to a subsample of the families' homes for further, in-depth observation and  
252 discussion, leading to 24 intensive case studies.

## 253 **Instruments**

254 The research instrument was developed in part based on the instrument used for a  
255 related follow-up study of persons unlocked during China's "686 Program" [3] also conducted  
256 jointly with the Harvard Medical School authors of this study. Two instruments were  
257 developed: one to record information from hospital records and medical staff participating in  
258 the evacuation and discharge of the patient, and one to guide the interview with the family  
259 caregiver and gather both qualitative and quantitative data. The first instrument was used to  
260 record hospital record information about the condition, diagnosis, and treatment of the patient  
261 at the time of admission, and comparable data about the patient at time of discharge. In  
262 addition, information about the condition of the patient and the setting of the locking at the  
263 time of the evacuation was recorded by a member of the evacuation team, and data about the  
264 quality of the patient and family at the time of the discharge was recorded by a person involved  
265 in the discharge. A second form was developed to guide the interview and record information

266 from the caregiver at the time of the follow-up study. Narrative data were elicited to record  
267 specific information about the history of illness and treatment, reasons and nature of locking,  
268 and family burden and experience, as well as information on symptoms and social functioning  
269 of the patient. A format for recording data on locking was developed, using the previous  
270 research experience of the first author on *pasung* (16). Scalar information about caregivers'  
271 experience of caring for the ill family member was based on an instrument developed for  
272 gathering similar data about family experience in a study of unlocking conducted in China [3].  
273 Family members were asked to rate their subjective experiences on analogue scales from 0  
274 "no impact" to 5 "extremely negative impact" for five categories of family burden: stigma or  
275 shame (*malu*), psychological pressures, economic burden, loss of personal or family spirit or  
276 energy (*semangat*), and interpersonal relationships. Ratings concerning T1 and T2 were  
277 obtained by caregivers' retrospective reflections on period before unlocking, experience at  
278 time of return of the family member, as well as current subjective experience (T3). Questions  
279 about social functioning were developed based on the authors' previous research in both Aceh  
280 and Yogyakarta. Interviews with caregivers were recorded and transcribed. In-depth  
281 interviews for the intensive case studies were also recorded and transcribed.

282

## 283 Results

284 In what follows we provide some of the most salient findings about those who had been  
285 unlocked through the program, about who the caregivers were and what their experiences  
286 were, and about the effectiveness of the program both in objective terms and subjective terms  
287 from the point of view of caregivers. Because most data on *pasung* in Indonesia are case  
288 reports or qualitative data [5], here we provide primarily quantitative data, rather than analysis  
289 of the in-depth interviews with family members.

## 290 Characteristics of the individuals, caregivers, and forms of 291 confinement at time of unlocking

292  
293 The research team recorded gender and age of the persons who were locked, as well  
294 as of their caregivers, and data on who were primary givers for whom. As is clear from the first  
295 set of tables (Tables 1-4), 58% of persons in *pasung* were men, and 55% of primary caregivers  
296 were also men. The patients had a mean age of 35. Of the 56 persons for whom a hospital  
297 diagnosis was available, 45 (80%) were diagnosed with schizophrenia and 8 (14%) with  
298 schizoaffective disorder. 26% of the 62 of those living with mental illness were reported to  
299 have been ill for ten or more years; 47% (56% of men, 35% of women) had been ill two years  
300 or less. 78% of the men, 27% of the women had some history of having previously worked.

301 Table 1. Numbers and proportion of participants by gender (N=62)

| Participants' role | Female N(%) | Male N(%) |
|--------------------|-------------|-----------|
| Primary Caregivers | 28 (45%)    | 34 (55%)  |
| Patients           | 26 (42%)    | 36 (58%)  |
| Health workers     | 48 (77%)    | 14 (23%)  |

302

303 Table 2. Caregiver's gender by patient's gender (N=62)

| Participants' role | Female Patients N(%) | Male Patients N(%) | Total N  |
|--------------------|----------------------|--------------------|----------|
| Female Caregivers  | 14 (45%)             | 14 (39%)           | 28 (45%) |
| Male Caregivers    | 12 (46%)             | 22 (61%)           | 34(55%)  |
| Total N            | 26                   | 36                 | 62       |

304

305 Table 3. Mean Ages of Patients and Caregivers (N=62)

| Participants | Mean           | Range |
|--------------|----------------|-------|
| Patients     | 35.1 (SD=8.9)  | 20-69 |
| Caregivers   | 52.8 (SD=13.7) | 23-80 |

306

307 Table 4. Participants' Age by Age Category (N=62)

| Participants' Age | Number (%) | Range |
|-------------------|------------|-------|
| Patients          |            |       |
| <29               | 16 (28%)   | 23-29 |
| 30-39             | 28 (45%)   | 30-39 |
| >40               | 18 (29%)   | 40-69 |
| Caregivers        |            |       |
| <29               | 4 (7%)     | 20-29 |

|       |          |       |
|-------|----------|-------|
| 30-39 | 7 (11%)  | 30-39 |
| >40   | 51 (82%) | 40-80 |

308

309 The mean age of the caregivers was 53 years old, with 82% of caregivers over 40 years  
 310 of age. Not shown in tables, 58% of all caregivers were parents, 26% siblings or cousins, 5%  
 311 were children of the individual in *pasung*, 5% were aunts or uncles, 3% spouses, and 3% were  
 312 persons from the community. In this sample, women were only slightly more likely to be  
 313 primary caregivers for women patients, men slightly more likely to be primary caregivers for  
 314 men.

315 Table 5 shows the form of restraints used for the locking or *pasung*. The largest number  
 316 (61%) were locked into a room -- which in some cases was simply the common room in the  
 317 house, in other cases a tiny, dirty room with only a bed without blankets and a tiny toilet. The  
 318 remainder were chained (36%), tied by rope, or detained in classic *pasung* or wooden stocks.  
 319 The great majority (86%) were restrained within the family's house; 16% were locked in a  
 320 space in a separate building, and a small number were restrained some place nearby. Just  
 321 over 70% were locked constantly, 24 hours a day/7 days per week, while the remaining 29%  
 322 were locked only part of the time.

323 Table 5. Form of restraint (N=62)

| Form               | Frequency N(%) |
|--------------------|----------------|
| Use of wood        | 3(5%)          |
| Metal chain        | 22(36%)        |
| Rope               | 3(5%)          |
| Locked in the room | 38(61%)        |

324

325 Table 6. Length of time of restraint (N=62)

| Duration                           | Frequency N(%) |
|------------------------------------|----------------|
| All the time 24/7                  | 44 (71%)       |
| On-and-off<br>(5-23 hours per day) | 18 (29%)       |

326

327           At the time those who were in *pasung* were released and taken to the hospital, the  
328 'evacuation team' asked family members a series of questions about why the individual had  
329 been locked. 75% of men and 42% of women were said to be locked because they had  
330 become violent; a slightly larger number were reported to have threatened others (83% of men,  
331 42% of women); and even more (83% of men and 50% of women) were reported to have 'run  
332 *amuk*,' a phrase used to describe persons who become totally out of control. A significant  
333 number of men (56%) and nearly all women (88%) had run away or threatened to run away;  
334 and 31% of men and 46% of women were considered a threat to harm themselves.

335           A significant number of family members reported, as an important reason for locking,  
336 that there was no one to care for the individuals (for 44% of men and 73% of women); family  
337 members reported feeling hopeless as a reason for locking (of men 56%, women 73%); and a  
338 large number gave economic reasons for locking the individuals (for 50% of the men, 73% of  
339 the women). A relatively small number reported not agreeing with the medications given (17%  
340 for men, 23% for women), and a significant number (25% for men, 27% for women) reported  
341 they felt the individual would be helped by being locked.

342           These overall findings for the reasons families give for locking a member suffering from  
343 severe mental illness are quite consistent with the primary types of reasons given in the  
344 qualitative studies and case reports described in the literature review [5] and are also  
345 consistent with the stories family caregivers gave in published narrative accounts [17-23] and  
346 the in-depth case studies to members of the research team for this project, as well as stories  
347 the UGM-Harvard research team members have heard over the years.

348           Families take no pleasure in having had to lock one of their members; they are often  
349 filled with shame and hide the family member from others in the community and members of  
350 the health care system. But they tell of feeling driven to the use of *pasung* by the individual's  
351 violence to family and community members, especially for men, and fear of harm to the

352 individual, particular young women, if they run away and wander in the community or go even  
353 further afield. And they report not having enough family members to care for the individual and  
354 having to detain the individual while family members work to earn their living.

355 Table 7 portrays the condition of the person living in *pasung* at the time of their  
356 unlocking by the hospital team. As the table shows, 70% were in quite bad condition, and only  
357 11% in reasonably good sanitary and health conditions. This is one reason hospitalization  
358 often required extensive medical care and physical rehabilitation as well as the provision of  
359 mental health services. Table 8 indicates the reasons family members gave for registering for  
360 the *bebas pasung* program.

361 Table 7. Patient's condition when released from *pasung* (N=62)

| Patient's condition                                      | Frequency N (%) |
|----------------------------------------------------------|-----------------|
| Extreme, patient was very dirty, room totally unsanitary | 27 (44%)        |
| Dirty and unsanitary                                     | 16 (26%)        |
| Not so clean                                             | 12 (19%)        |
| Clean and hygienic                                       | 2 (3%)          |
| Overall in a good condition, clean and well care         | 5 (8%)          |

362 Table 8. Reason to report/register to the *bebas pasung* program

| Reasons         | Frequency N (%) |
|-----------------|-----------------|
| Free medication | 26 (42%)        |
| Effective care  | 31 (50%)        |
| Continuous care | 14 (23%)        |
| Compulsory      | 4 (6.5%)        |

364

## 365 Findings Concerning Effectiveness of the Program

366 This project studied the effectiveness of the *bebas pasung* program in Soerojo Hospital  
367 in two formal ways: by examining how many of those who were released and treated, before  
368 returning home, were re-locked at some time during the two years since unlocking; and by  
369 providing scalar data from the primary about a number of dimensions of their experience  
370

371 before unlocking, at the time of the individual's return to their home, and at the two year follow-  
 372 up interview.

373 Overall, as Table 9 shows, 24% of those unlocked -- 17% of men, 24% of women --  
 374 were reported to have been returned to *pasung* at some time during the past two years since  
 375 being returned to the family. This may also be framed by noting that 76% of those unlocked  
 376 remained unlocked through the initial two years of being returned to the community. Of those  
 377 relocked, use of chains or mechanical restraints was less, while more were confined to a room  
 378 in the house, than was true before the intervention.

379

380 Table 9. Numbers of Patients Relocked during two year period, as reported by family

| <b>Pasung status/<br/>patient's gender</b> | <b>Male N(%)</b> | <b>Female N(%)</b> | <b>Total</b> |
|--------------------------------------------|------------------|--------------------|--------------|
| Relocked at some time                      | 6 (17%)          | 9 (35%)            | 15 (24%)     |
| Not relocked since returned                | 30 (83%)         | 17 (65%)           | 47 (76%)     |
| Total N                                    | 36 (100%)        | 26 (100%)          | 62 (100%)    |

381

382 The scalar data (Tables 10 to 15) show extremely significant improvement in the  
 383 experience of the family care providers from the time of unlocking (T1) to the time of return  
 384 home (T2), and demonstrates that this improvement was largely maintained through two years  
 385 (T3). This was true for both male and female caregivers. Whether in terms of their experience  
 386 of shame, psychological distress reported, economic burden reported, relationships within the  
 387 family, or overall family 'spirit' (*semangat*), caregivers reported great benefits from the  
 388 unlocking program.

389 Table 10. Family's level of shame (*malu*) at different points of time (N=62)

| <b>Points of time</b> | <b>Mean (SD)</b> | <b>Points of time</b> | <b>Mean difference</b> | <b>p values</b> |
|-----------------------|------------------|-----------------------|------------------------|-----------------|
| T1                    | 3.29 (1.50)      | T1-T2                 | 1.50                   | .000            |
| T2                    | 1.79 (1.04)      | T2-T3                 | 0.29                   | .008            |
| T3                    | 1.50 (.099)      | T1-T3                 | 1.79                   | .000            |

390 *T1=while in pasung; T2= after discharged from hospital; T3= 18-24 months later*



391 (5-extremely negative impact; 1=no impact)

392

393 Table 11. Family's economic burden at different points of time (N=62)

| Points of time | Mean (SD)   | Points of time | Mean difference | p values |
|----------------|-------------|----------------|-----------------|----------|
| T1             | 2.89 (1.66) | T1-T2          | 1.05            | .000     |
| T2             | 1.84 (1.12) | T2-T3          | 0.02            | .898     |
| T3             | 1.82 (1.11) | T1-T3          | 1.07            | .000     |

394 T1=while in pasung; T2= after discharged from hospital; T3= 18-24 months later

395 (5-extremely negative impact; 1=no impact)

396

397 Table 12. Family's psychological distress at different points of time

| Points of time | Mean (SD)   | Points of time | Mean difference | p values |
|----------------|-------------|----------------|-----------------|----------|
| T1             | 3.66 (1.38) | T1-T2          | 1.76            | .000     |
| T2             | 1.90 (1.16) | T2-T3          | 0.24            | .087     |
| T3             | 1.66 (1.04) | T1-T3          | 2.00            | .000     |

398 T1=while in pasung; T2= after discharged from hospital; T3= 18-24 months later

399 (5-extremely negative impact; 1=no impact)

400

401 Table 13. Patient's relationship to family at different points of time (N=62)

| Points of time | Mean (SD)   | Points of time | Mean | p values |
|----------------|-------------|----------------|------|----------|
| T1             | 2.16 (1.48) | T1-T2          | 0.64 | .000     |
| T2             | 1.52 (1.02) | T2-T3          | 0.13 | .020     |
| T3             | 1.39 (.95)  | T1-T3          | 0.77 | .000     |

402 T1=while in pasung; T2= after discharged from hospital; T3= 18-24 months later

403 (5-extremely negative impact; 1=no impact)

404

405 Table 14. Family's spirit (*semangat*) at different points of time (N=62)

| Points of time | Mean (SD)   | Points of time | Mean diff | p values |
|----------------|-------------|----------------|-----------|----------|
| T1             | 2.79 (1.65) | T1-T2          | 1.08      | .000     |
| T2             | 1.71 (.98)  | T2-T3          | 0.26      | .003     |
| T3             | 1.45 (.84)  | T1-T3          | 1.34      | .000     |

406 T1=while in pasung; T2= after discharged from hospital; T3= 18-24 months later

407 (5-extremely negative impact; 1=no impact)

408

409

410 This improvement was, not surprisingly, more powerful for those caregivers who did not

411 feel it necessary to re-lock the person who had been unlocked and treated (Table 15) than for

412 those who found it necessary to relock their family member. But even for these caregivers,

413 there remained a benefit along the scalar dimensions studied for the program.

414 Table 15. Family's experience of shame (*malu*) with or without re-pasung/relocked

| Points of time | Mean scores<br>No relocking | Mean scores<br>Relocking | p values |
|----------------|-----------------------------|--------------------------|----------|
|----------------|-----------------------------|--------------------------|----------|

|    |      |      |                  |
|----|------|------|------------------|
| T1 | 3.23 | 3.47 | F=.271 (p=.600)  |
| T2 | 1.53 | 2.60 | F=14.60 (p<.000) |
| T3 | 1.17 | 2.53 | F=33.04 (p<.000) |

415 *T1=while in pasung; T2= after discharged from hospital; T3= 18-24 months later*  
 416 *(5-extremely negative impact; 1=no impact)*

417  
 418 At the time the patient was returned to the family, 80% were reported to take  
 419 medications regularly. However, at follow-up, 44% of all patients continued to take  
 420 medications regularly and another 21% irregularly or frequently not taking medications. Table  
 421 16 shows the relationship between continued use of medications and whether the individual  
 422 was returned to *pasung* of confinement during the two-year follow-up program. Of those  
 423 relocked, 33% took medications regularly and 67% either irregularly or stopped medications  
 424 completely, while of those not relocked during the two-year period, 47% took medications  
 425 regularly and 53% either irregularly or stopped medications entirely. There was thus a  
 426 tendency for those who did not take medicines to be at slightly higher risk for being relocked,  
 427 but the difference is not statistically significant.

428 Table 16. Medication Status of Patients Relocked (Re-pasung)

| Medication Status                         | Relocked N(%)     | Not relocked N(%)  | Total     |
|-------------------------------------------|-------------------|--------------------|-----------|
| Regularly taking medication up to present | 5 (33%)           | 22 (47%)           | 27 (44%)  |
| Irregularly taking medication             | 2 (13%)           | 11(23%)            | 13 (21%)  |
| Frequently not taking medication          | 3 (20 %)          | 4 (9%)             | 7 (11%)   |
| Began, but stopped taking medication      | 3 (20%)           | 5 (11%)            | 8 (13%)   |
| Never take medicine                       | 2 (13%)           | 5 (11%)            | 7 (11%)   |
| Total N                                   | 15(100%)<br>(24%) | 47 (100%)<br>(76%) | 62 (100%) |

429  
 430 At follow-up, 51% of this group of persons who had been confined in *pasung* two years  
 431 earlier were now able to care for themselves, 24% were reported to be capable of productive  
 432 work and another 25% of more limited work, 32% were reported to have good relationships  
 433 with their family and another 50% fair relations with their family, and 25% were reported to

434 have good relationships with neighbors while 38% were reported to be fairly able to engage  
435 other others in the community.

## 436 Discussion

437 This study provides new empirical evidence concerning persons with severe mental  
438 illness who have been placed in *pasung* or family-based confinement in one province in  
439 Indonesia, the nature of the locking or confinement, reasons families gave for locking, who  
440 were considered the primary caregivers, and families' ratings of their experiences associated  
441 with having a member of their family in *pasung*. The fact that 70% of patients were considered  
442 "dirty and unsanitary" at the time of the unlocking provides a numerical rating of the conditions  
443 of persons who lived in confinement or *pasung*. Photos taken by the hospital teams  
444 responsible for the unlocking and for taking those unlocked to the hospital tell this story far  
445 more vividly. Many lived in genuinely horrifying conditions and required very significant medical  
446 care alongside the mental health care they received when they were unlocked and  
447 hospitalized. The *bebas pasung* program thus had a genuine sense of "freeing" (*bebas*) those  
448 confined in often inhumane living conditions.

449 There were clear strengths and weaknesses of the Soerojo Mental Hospital program of  
450 unlocking and mental health treatment described in this study. Overall, the program was  
451 developed systematically, freed 1,135 individuals with severe mental illness from locking by  
452 March 2013, and provided them with good quality, hospital-based medical care and initial  
453 rehabilitation services, free of cost, before returning them to their families. The program  
454 provided a powerful learning experience by the public health team of the Soerojo Hospital, and  
455 the program continues until today.

456 The program also had a major effect on the health of the patients and the experience of  
457 family members. Three-quarters of all persons unlocked had not been re-locked at any time

458 during the two years since unlocking, and family caregivers experienced enormous benefits of  
459 the program. Over half of those persons who had been locked, shackled or confined were now  
460 able to care for themselves, and nearly half were able to engage in fully or partially productive  
461 work. Over 80% were now reported to have good or fair relations with their family and over  
462 60% able to fully or partially engage with neighbors. Given these findings, it is not surprising  
463 that caregivers rated their experiences of living with and caring for the ill member greatly  
464 improved at the time the person was returned from the hospital, and that positive rating of their  
465 experiences continued into year two when the follow-up was conducted.

466 On the other hand, only 44% of these persons took medications regularly at two-year  
467 follow-up, and another 21% reported taking medications irregularly. Of these, 47% of those  
468 who had never been relocked, compared with 33% of those who were relocked, were taking  
469 medications regularly at time of follow-up, and 70% of those who had never been relocked,  
470 compared with 47% of those who were relocked, were taking medications regularly or  
471 irregularly at time of follow-up. These findings testify to the limited access to continuous care  
472 and medications. They do not provide strong evidence that failure to take medications is the  
473 primary reason for being re-locked.

474 These findings may be linked directly to the leading complaint about the program by  
475 caregivers -- that there was too little follow-up by the program. The quality of continued  
476 community-based services varied by locale and activity of local primary health care centers,  
477 and when services were provided by visiting nurses these were commented on positively. On  
478 the other hand, only a third of caregivers rated services of village health workers (*cadre*)  
479 positively.

480 The widely cited follow-up study of an unlocking intervention in China [3], which served  
481 as one important model for this follow-up study, found that only 8% of those unlocked had  
482 been relocked by year 7, and that 72% remained on medication. Compared with these data,

483 the unlocking program in Central Java was less successful. It is important to note that the  
484 Chinese program was part of a comprehensive mental health reform movement that led to  
485 regular visits by mental health teams down to the village and family level. It is equally  
486 important to note that the Chinese program -- the so-called 686 Program [24,25] -- was  
487 initiated with the rationale of reducing the "dangerousness" of persons with severe mental  
488 illness, so that levels of stigmatizing surveillance were quite high and remain high until today.

489 By contrast, programs that resulted from the 2010 national call for an Indonesia free of  
490 *pasung* operated, to a large extent, as stand-alone programs, not as a comprehensive reform  
491 of the overall mental health system. The Indonesian program described here was not linked to  
492 the development of comprehensive, community-based outreach programs to provide services  
493 for those living in the community with severe mental illnesses. This limited the overall  
494 effectiveness of the program. Despite these limitations, the program made an enormous  
495 difference in the lives of many persons in this part of Central Java who had been living in  
496 *pasung*, as well as for their families.

497 This study was only able to gather data from 62 of the 114 target families, leading to  
498 potential selection biases of the study. This is the limitations of the study. Also, the follow-up  
499 period of this study was limited to 18 to 24 months. More comprehensive and longer-term  
500 follow-up studies of this program and unlocking programs around Indonesia are needed.

501

## 502 **Conclusions**

503 The 'unlocking and treatment' programs initiated by Ministry of Health of Indonesia in  
504 2010 have varied in structure and quality. As we have noted, following the only major review of  
505 unlocking in Indonesia [5], we need far more empirical data about local programs and their  
506 short- and long-term effectiveness. This study was carried out to provide basic empirical

507 information about persons with severe mental illness in one area of Indonesia who lived in  
508 community-based confinement, about one specific program of unlocking and treatment, and  
509 about the effectiveness of this program over a two-year period. This study provides evidence  
510 of the enormous importance of such programs. Despite its limitations, the program had  
511 enormous benefits for those living with severe mental illness where in *pasung* and their  
512 families. This study also documents the limitations of programs not embedded in more  
513 comprehensive mental health services reform. Clearly, unlocking programs in Indonesia need  
514 to be linked far more closely to the development of real community-based mental health and  
515 rehabilitation services that maintain care of the patient and provide a genuine pathway toward  
516 recovery [26].

## 517 Acknowledgements

518 The authors gratefully acknowledge the full support of many staff members from the Soerojo  
519 Mental Hospital, Magelang, Central Java, Indonesia. Special thanks to the Keswamas staff  
520 members: Jofita Panggelo, MD., Noviandy Radhikabudi, S.Kep., MKes and the four nurses from  
521 Soerojo Hospital who participated in the interview process. We are particularly grateful to the  
522 patients and families who actively participated in this project.

523  
524 We acknowledge that the four scales on family experience were based on the research in  
525 China, described by Guan et al. (2015). Prof. Mary-Jo D. Good was a primary advisor on the  
526 project in China, where she participated in designing the research instrument. Parts of this  
527 instrument were adapted for use in the Central Java project, for which Prof. Good was also  
528 primary advisor.

529  
530

## 531 References

- 532  
533 1. Patel V, Saxena S, Lund C, Thornicroft G, Baingana F, Bolton P, et al. The Lancet  
534 Commission on global mental health and sustainable development. Vol. 392, The  
535 Lancet. 2018.
- 536 2. Human Rights Watch. Human Rights Watch publications. 2018. Indonesian shackling  
537 reduced but persists: Oversight crucial to end abuse of people with disabilities. .
- 538 3. Guan L, Liu J, Wu XM, Chen D, Wang X, Ma N, et al. Unlocking patients with mental  
539 disorders who were in restraints at home:A National follow-up study of china's new  
540 public mental health initiatives. PLoS One. 2015;10(4):  
541 e0121425.doi:10.1371/journal.pone.0121425.
- 542 4. Good MJD, Good B, Tyas TH. Unlocking the Severely Mentally Ill: Findings from  
543 Intervention Programs Designed to Unlock, Treat, and Return to Family Settings in  
544 Indonesia and China. New York City; 2018 Oct. (5th World Congress of Cultural  
545 Psychiatry).
- 546 5. Hidayat MT, Lawn S, Muir-Cochrane E, Oster C. The use of pasung for people with  
547 mental illness: a systematic review and narrative synthesis. Vol. 14, International Journal  
548 of Mental Health Systems. 2020. 14(1), 90. <https://doi.org/10.1186/s13033-020-00424-0>
- 549 6. Britannica [Internet]. 2024. 2002 Bali Bombings. Available from:  
550 <https://www.britannica.com/event/2002-Bali-Bombings>
- 551 7. Knowledge Hub [Internet]. 2005. Criminal - Bali Bombings. Available from:  
552 <https://knowledge.aidr.org.au/resources/criminal-bali-bombings-2005/>
- 553 8. Bradsher K. The New York Times. 2003. Deadly Car Bombing Shakes Marriott Hotel in  
554 Jakarta.
- 555 9. Aspinall E. The Helsinki Agreement: A More Promising Basis for Peace in Aceh?  
556 Washington: East-West Center Washington; 2005.
- 557 10. DelVecchio MJ et al. Complex engagements: Responding to violence in postconflict  
558 Aceh.In: Fassin, D, Pandolfi, M, editors. Contemporary states of emergency: The politics  
559 of military and humanitarian interventions. 2010. Pp 241-266.
- 560 11. Good B, Good MJD, Grayman JH. Inside Indonesia. 2013. A new model for mental  
561 health care?
- 562 12. Puteh I, Good BJ, Good MJD, Grayman JH. Mereka-Ulang Pelayanan Kesehatan Jiwa  
563 Pascatsunami dan Pascakonflik Aceh. In: Pols H, Setiawan P, Marchira CR, Irmansyah,  
564 Suci EST, Good MJD, et al., editors. Jiwa Sehat, Negara Kuat. Jakarta: Kompas; 2019.
- 565 13. Puteh I, Marthoenis M, Minas H. Aceh Free Pasung: Releasing the mentally ill from  
566 physical restraint. Int J Ment Health Syst. 2011;5.
- 567 14. Irmansyah I, Prasetyo YA, Minas H. Human rights of persons with mental illness in  
568 Indonesia: More than legislation is needed. Int J Ment Health Syst. 2009;3.
- 569 15. Irmansyah. Menuju Indonesia Bebas Pasung: Di Mana Peran Rumah Sakit Jiwa dan  
570 Rumah Sakit Umum? . In: Pols H, Setiawan P, Marchira CR, Irmansyah, Suci EST, Good  
571 MJD, et al., editors. Jiwa Sehat, Negara Kuat. Jakarta: Kompas; 2019.
- 572 16. Tyas TH. Pasung: Family Experience of Dealing with" the Deviant" in Nanggroe Aceh  
573 Darussalam, Indonesia. Lap Lambert Academic Publishing; 2010.
- 574 17. Anto S, Colucci E. Free from pasung: A story of chaining and freedom in Indonesia told  
575 through painting, poetry and narration. World Cultural Psychiatry Research Review.  
576 2015;10(3/4).
- 577 18. Catharina Daulima NH. Preventing Pasung by mentally ill patients' families. Enferm Clin.  
578 2018;28.
- 579 19. Eka AR, Daulima NHC. Factors related to pasung on people with mental illness.  
580 International Journal of Nursing and Health Services (IJNHS). 2019;2(2).

- 581 20. Laila NH, Mahkota R, Krianto T, Shivalli S. Perceptions about pasung (physical restraint  
582 and confinement) of schizophrenia patients: A qualitative study among family members  
583 and other key stakeholders in Bogor Regency, West Java Province, Indonesia 2017. *Int*  
584 *J Ment Health Syst.* 2018;12(1).
- 585 21. Laila NH, Mahkota R, Shivalli S, Bantas K, Krianto T. Factors associated with pasung  
586 (physical restraint and confinement) of schizophrenia patients in Bogor regency, West  
587 Java Province, Indonesia 2017. *BMC Psychiatry.* 2019;19(1).
- 588 22. Katuuk HM, Daulima NHC, Wardani IY. Families' experience caring for mentally ill  
589 patients with re-pasung. *Enferm Clin.* 2019;29.
- 590 23. Rahman A, Marchira CR, Rahmat I. Peran dan motivasi perawat kesehatan jiwa dalam  
591 program bebas pasung: studi kasus di Mataram. *BKM Journal of Community Medicine*  
592 *and Public Health.* 2016;
- 593 24. Ma H. Integration of hospital and community services-the '686 Project'-is a crucial  
594 component in the reform of China's mental health services. *Shanghai Arch Psychiatry.*  
595 2012;24(3).
- 596 25. Good BJ, Good MJDV. Significance of the 686 Program for China and for global mental  
597 health. *Shanghai Arch Psychiatry.* 2012;24(3).
- 598 26. Subandi MA, Nihayah M, Marchira CR, Tyas T, Marastuti A, Pratiwi R, et al. The  
599 principles of recovery-oriented mental health services: A review of the guidelines  
600 from five different countries for developing a protocol to be implemented in  
601 Yogyakarta, Indonesia. *PLoS One.* 2023;18(3 March):e0276802.  
602
